# Supplementary material for: White LED Lighting Increases the Root Productivity of Panax ginseng C. A. Meyer in a Hydroponic Cultivation System of a Plant Factory
Source: MDPI journal article supplement (doi:10.3390/biology12081052), 2023-07-26
Supplement: s1 [file s1]

## Supplementary Materials

Table S1. Model fit of physiological and growth models of *Panax ginseng* according to light environment.

|       | AIC     | BIC     | n  | Baseline test |    |       |
|-------|---------|---------|----|---------------|----|-------|
|       |         |         |    | $\chi^2$      | df | p     |
| Model | 447.278 | 523.759 | 50 | 23.686        | 11 | 0.014 |

Table S2. Additional fit measure results.

| Index                                | Value        |
|--------------------------------------|--------------|
| Comparative Fit Index (CFI)          | 0.973        |
| Normed fit index(NFI)                | 0.953        |
| Bollen's Incremental Fit Index (IFI) | 0.974        |
| Relative Noncentrality Index (RNI)   | 0.973        |
| Goodness of fit index (GFI)          | <b>0.993</b> |

Table S3. Regression coefficients and p-values of model.

| Predictor | Outcome | Estimate | Std. Error | z-value | p      | Standardized |        |        |
|-----------|---------|----------|------------|---------|--------|--------------|--------|--------|
|           |         |          |            |         |        | All          | LV     | Endo   |
| E ~       | ADW     | 0.060    | 0.154      | 0.392   | 0.695  | -0.241       | 0.362  | 0.061  |
| R ~       | ADW     | 0.900    | 0.289      | 3.113   | 0.002  | 0.333        | 1.467  | 0.448  |
| Y ~       | ADW     | 1.738    | 0.445      | 3.902   | < .001 | 0.865        | 2.611  | 0.706  |
| Ci ~      | RDW     | 0.467    | 0.128      | 3.643   | < .001 | 0.216        | 0.718  | 0.465  |
| B ~       | RDW     | -0.942   | 0.280      | -3.369  | < .001 | -1.490       | -0.394 | -0.465 |
| W ~       | RDW     | 1.167    | 0.306      | 3.813   | < .001 | 0.567        | 1.767  | 0.470  |
| R ~       | Pn      | -0.505   | 0.292      | -1.728  | 0.084  | -1.078       | 0.068  | -0.250 |
| B ~       | Pn      | 0.065    | 0.292      | 0.222   | 0.824  | -0.508       | 0.638  | 0.032  |
| W ~       | Pn      | 1.925    | 0.293      | 6.565   | < .001 | 1.351        | 2.500  | 0.778  |
| Y ~       | Pn      | -0.360   | 0.459      | -0.785  | 0.433  | -1.259       | 0.539  | -0.145 |
| gs ~      | Pn      | 0.017    | 0.122      | 0.141   | 0.888  | -0.221       | 0.255  | 0.017  |
| R ~       | E       | -0.134   | 0.037      | -3.587  | < .001 | -0.207       | -0.061 | -0.066 |
| B ~       | E       | -0.072   | 0.036      | -1.994  | 0.046  | -0.144       | -0.001 | -0.036 |
| W ~       | E       | 0.281    | 0.050      | 5.646   | < .001 | 0.183        | 0.379  | 0.114  |
| Y ~       | E       | 0.145    | 0.057      | 2.526   | 0.012  | 0.032        | 0.257  | 0.059  |
| gs ~      | E       | 0.923    | 0.015      | 61.102  | < .001 | 0.894        | 0.953  | 0.923  |

|            |           |            |        |       |        |        |        |        |        |
|------------|-----------|------------|--------|-------|--------|--------|--------|--------|--------|
| Pn         | ~         | E          | -0.041 | 0.018 | -2.342 | 0.019  | -0.076 | -0.007 | -0.041 |
| R          | ~         | Ci         | 2.486  | 0.144 | 17.208 | < .001 | 2.203  | 2.769  | 1.230  |
| B          | ~         | Ci         | 2.233  | 0.140 | 15.897 | < .001 | 1.958  | 2.508  | 1.105  |
| W          | ~         | Ci         | -1.028 | 0.194 | -5.306 | < .001 | -1.408 | -0.648 | -0.416 |
| Y          | ~         | Ci         | 2.360  | 0.225 | 10.473 | < .001 | 1.918  | 2.802  | 0.954  |
| Pn         | ~         | Ci         | -0.159 | 0.068 | -2.346 | 0.019  | -0.292 | -0.026 | -0.159 |
| E          | ~         | Ci         | 0.073  | 0.063 | 1.160  | 0.246  | -0.050 | 0.196  | 0.073  |
| R          | ~         | gs         | 0.042  | 0.340 | 0.124  | 0.902  | -0.624 | 0.708  | 0.021  |
| B          | ~         | gs         | -0.021 | 0.340 | -0.062 | 0.951  | -0.687 | 0.645  | -0.010 |
| W          | ~         | gs         | 0.210  | 0.340 | 0.618  | 0.537  | -0.456 | 0.876  | 0.085  |
| Y          | ~         | <b>gs</b>  | 1.638  | 0.481 | 3.407  | < .001 | 0.696  | 2.581  | 0.662  |
| <b>RDW</b> | <b>~~</b> | <b>ADW</b> | -0.104 | 0.091 | -1.144 | 0.252  | -0.164 | -0.104 | -0.164 |

---

~: Regression analysis, ~~:Correlation analysis.
